# Supplementary material
Source: publisher figshare collection journal article supplement (https://tandf.figshare.com/ndownloader/files/21740955)
Supplement: Supplementary file 1 [file 21740955]

**Supplementary Material**

**
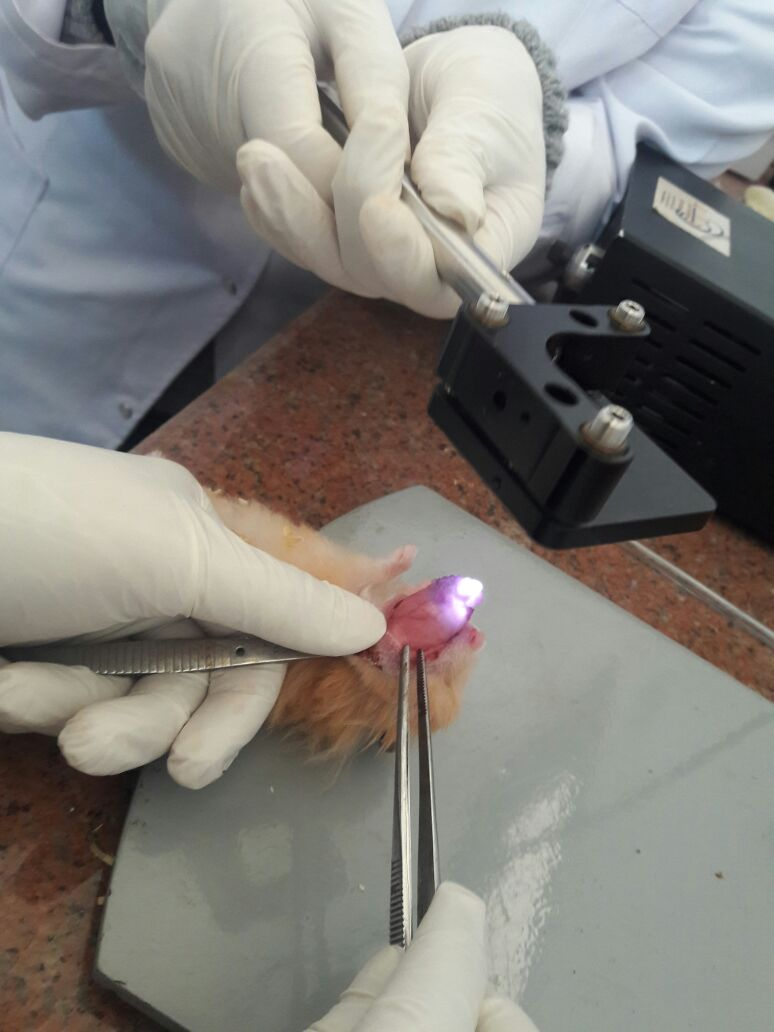
**

**Fig. S1.** Exposure of hamster with OSCC to near-infrared laser.

***
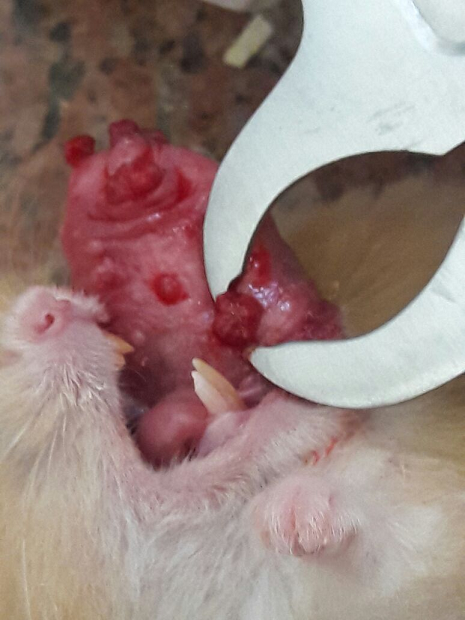
***

**Fig. S1.** Tumor size measurements with a caliber.

***Grading of epithelial dysplasia*** was carried out according to Banoczy and Sciba (1976) and modified by El-Dakhakhny et al (2010) due to thin nature of hamsters’ epithelial lining. Epithelial dysplasia was graded into mild, moderate, severe, and carcinoma in situ.

Mild: when less than 3 dysplastic criteria were present.

Moderate: when 3-7 changes are present.

Severe: when more than 7 changes were present.

Carcinoma in situ: when dysplastic criteria distributed from top to bottom with intact basement membrane.

***Grading of squamous cell carcinoma*** was carried out according to Broder’s classification. Tumors were graded on the basis of degree of differentiation and keratinisation of tumor cells into:

Grade I: well differentiated tumors (75-100%) of cells are differentiated.

Grade II: moderately differentiated tumors (50-75%) of cells are differentiated.

Grade III: poorly differentiated tumors (25-50%) of cells are differentiated.

Grade IV: anaplastic tumors (0-25%) of cells are differentiated.
